# Supplementary material for: Synergistic Impacts of Organic Acids and pH on Growth of Pseudomonas aeruginosa: A Comparison of Parametric and Bayesian Non-parametric Methods to Model Growth
Source: Front Microbiol. 2019 Jan 8;9:3196. doi: 10.3389/fmicb.2018.03196 (PMC6331447; doi:10.3389/fmicb.2018.03196)
Supplement: Supplementary file 1 [file Table_1.XLSX]

## Sheet: Sheet1
	pH	conc	X	mean.growth.rate	std.growth.rate	interpreted.mean.growth.rate	X.1	mean.scaled.carrying.capacity..K.IC.	std.carrying.capacity	logged.scaled.carrying.capacity..log2.K.IC.	X.2	error..L2.norm.	condition	strain
1	7	0	NA	0.284593	0.0782801	0.284593	NA	62.8552	18.3592	5.97396	NA	2.03852	acetic	PA01
2	7	5	NA	0.271643	0.0729194	0.271643	NA	53.4849	26.722	5.74106	NA	2.25242	acetic	PA01
3	7	10	NA	0.276942	0.0619462	0.276942	NA	52.3994	5.19185	5.71148	NA	2.01761	acetic	PA01
4	7	20	NA	0.314215	0.13242	0.314215	NA	45.6752	24.1895	5.51334	NA	3.50841	acetic	PA01
5	6.5	0	NA	0.281355	0.0525689	0.281355	NA	64.638	11.6664	6.01431	NA	1.57209	acetic	PA01
6	6.5	5	NA	0.24679	0.0643306	0.24679	NA	90.8068	62.0909	6.50473	NA	2.36506	acetic	PA01
7	6.5	10	NA	0.231575	0.0419587	0.231575	NA	101.414	59.0226	6.66411	NA	2.36444	acetic	PA01
8	6.5	20	NA	0.256494	0.0904912	0.256494	NA	109.866	103.433	6.7796	NA	4.1971	acetic	PA01
9	6	0	NA	0.286868	0.0173328	0.286868	NA	52.3641	4.72494	5.7105	NA	1.70779	acetic	PA01
10	6	5	NA	0.228587	0.00699745	0.228587	NA	69.8705	17.9503	6.12661	NA	1.13245	acetic	PA01
11	6	10	NA	0.191498	0.0175001	0.191498	NA	5771.02	12215.7	12.4946	NA	2.72831	acetic	PA01
12	6	20	NA	0.0189801	0.022572	-0.0189801	NA	0.190525	0.188891	-2.39195	NA	4.65021	acetic	PA01
13	5.5	0	NA	0.305651	0.00592389	0.305651	NA	66.3688	4.00834	6.05243	NA	2.12768	acetic	PA01
14	5.5	5	NA	0.175878	0.0309099	0.175878	NA	138.857	99.3926	7.11746	NA	4.05435	acetic	PA01
15	5.5	10	NA	5.31057	11.31	-5.31057	NA	0.626858	0.540085	-0.673789	NA	3.26892	acetic	PA01
16	5.5	20	NA	0.379047	0.288736	-0.379047	NA	0.651941	0.163135	-0.617188	NA	3.07655	acetic	PA01
17	5	0	NA	0.254703	0.0128967	0.254703	NA	145.831	22.1538	7.18815	NA	2.14621	acetic	PA01
18	5	5	NA	0.224821	0.147414	-0.224821	NA	0.636795	0.139841	-0.651099	NA	4.02792	acetic	PA01
19	5	10	NA	5.30887	11.2836	-5.30887	NA	0.897104	0.120693	-0.156653	NA	0.499084	acetic	PA01
20	5	20	NA	5.79809	11.7072	5.79809	NA	1.31149	1.10142	0.391206	NA	2.26831	acetic	PA01
21	7	0	NA	0.270295	0.037647	0.270295	NA	61.8483	26.3809	5.95066	NA	1.74198	butyric	PA01
22	7	5	NA	0.410947	0.132671	0.410947	NA	81.049	20.0128	6.34072	NA	2.68439	butyric	PA01
23	7	10	NA	0.265606	0.0921491	0.265606	NA	66.0474	66.7661	6.04543	NA	3.79405	butyric	PA01
24	7	20	NA	0.343937	0.0579651	0.343937	NA	51.0332	18.1294	5.67336	NA	2.48659	butyric	PA01
25	6.5	0	NA	0.262275	0.034585	0.262275	NA	54.8526	11.861	5.77749	NA	1.61017	butyric	PA01
26	6.5	5	NA	0.318865	0.0786585	0.318865	NA	68.054	18.3393	6.08861	NA	2.69367	butyric	PA01
27	6.5	10	NA	0.233983	0.0269715	0.233983	NA	36.0137	18.2837	5.17048	NA	2.04812	butyric	PA01
28	6.5	20	NA	0.241292	0.0807626	0.241292	NA	65.7548	31.9017	6.03902	NA	2.93421	butyric	PA01
29	6	0	NA	0.247094	0.0189757	0.247094	NA	58.1476	5.4989	5.86165	NA	1.58559	butyric	PA01
30	6	5	NA	0.198676	0.0215893	0.198676	NA	108.837	36.5403	6.76602	NA	1.76072	butyric	PA01
31	6	10	NA	0.166629	0.0131115	0.166629	NA	150.456	166.876	7.2332	NA	2.1683	butyric	PA01
32	6	20	NA	11.9057	10.7617	11.9057	NA	12.5018	25.4642	3.64407	NA	17.8522	butyric	PA01
33	5.5	0	NA	0.268135	0.0415378	0.268135	NA	43.6169	15.0082	5.44681	NA	2.04995	butyric	PA01
34	5.5	5	NA	0.20078	0	0.20078	NA	60.7144	0	5.92397	NA	7.76222	butyric	PA01
35	5.5	10	NA	8.11961	10.0836	8.11961	NA	1.13808	0.356195	0.186604	NA	1.43011	butyric	PA01
36	5.5	20	NA	3.39676	6.8581	-3.39676	NA	0.814757	0.463814	-0.295558	NA	1.19983	butyric	PA01
37	5	0	NA	0.224669	0.0115927	0.224669	NA	210.973	98.7259	7.72092	NA	1.93379	butyric	PA01
38	5	5	NA	8.3013	9.42309	8.3013	NA	1.17016	0.361693	0.2267	NA	0.794033	butyric	PA01
39	5	10	NA	6.85802	10.2474	-6.85802	NA	0.939668	0.306527	-0.0897771	NA	0.419235	butyric	PA01
40	5	20	NA	4.04299	8.97438	-4.04299	NA	0.37171	0.569804	-1.42775	NA	7.57595	butyric	PA01
41	7	0	NA	0.394371	0.0228778	0.394371	NA	45.5192	8.45876	5.5084	NA	2.20729	propionic	PA01
42	7	5	NA	0.317683	0.0231811	0.317683	NA	35.4805	7.83725	5.14896	NA	2.37005	propionic	PA01
43	7	10	NA	0.312772	0.0143056	0.312772	NA	29.7174	4.2015	4.89324	NA	1.80906	propionic	PA01
44	7	20	NA	0.286173	0.0375412	0.286173	NA	20.5839	1.80558	4.36344	NA	1.90217	propionic	PA01
45	6.5	0	NA	0.319313	0.0645534	0.319313	NA	52.9917	12.979	5.72769	NA	1.85726	propionic	PA01
46	6.5	5	NA	0.333393	0.239048	0.333393	NA	33.8203	14.926	5.07982	NA	2.77456	propionic	PA01
47	6.5	10	NA	0.206264	0.0353213	0.206264	NA	26.3081	8.5226	4.71743	NA	1.76121	propionic	PA01
48	6.5	20	NA	0.452695	0.179018	0.452695	NA	34.6225	24.8242	5.11364	NA	12.3467	propionic	PA01
49	6	0	NA	0.258921	0.030505	0.258921	NA	48.6719	8.53365	5.60502	NA	1.94211	propionic	PA01
50	6	5	NA	0.372111	0.323237	0.372111	NA	59.8179	28.4459	5.90251	NA	8.53732	propionic	PA01
51	6	10	NA	NA	NA	NA	NA	NA	NA	NA	NA	NA	propionic	PA01
52	6	20	NA	0.101654	0.162915	0.101654	NA	2.69735	5.44622	1.43154	NA	6.38433	propionic	PA01
53	5.5	0	NA	0.268058	0.0252392	0.268058	NA	47.128	13.2881	5.55851	NA	2.01362	propionic	PA01
54	5.5	5	NA	1.39956	1.16725	1.39956	NA	9.60003	15.479	3.26304	NA	14.4502	propionic	PA01
55	5.5	10	NA	4.38203	10.7334	-4.38203	NA	0.179621	0.439251	-2.47697	NA	7.39391	propionic	PA01
56	5.5	20	NA	4.71997	11.0635	-4.71997	NA	0.552553	0.612009	-0.855816	NA	2.98765	propionic	PA01
57	5	0	NA	0.251585	0.0126001	0.251585	NA	212	50.5391	7.72792	NA	2.31444	propionic	PA01
58	5	5	NA	14.2023	15.5617	-14.2023	NA	0.601264	0.660335	-0.73393	NA	3.97104	propionic	PA01
59	5	10	NA	10.6626	14.6009	-10.6626	NA	0.459817	0.633767	-1.12087	NA	3.74563	propionic	PA01
60	5	20	NA	4.48715	10.2183	-4.48715	NA	0.678176	0.744667	-0.560268	NA	2.66863	propionic	PA01
61	7	0	NA	0.225075	0.0161688	0.225075	NA	58.0103	10.5536	5.85824	NA	1.18634	sorbic	PA01
62	7	5	NA	0.246171	0.0469152	0.246171	NA	32.747	11.5284	5.03329	NA	2.01301	sorbic	PA01
63	7	10	NA	0.207851	0.0366825	0.207851	NA	38.9323	18.7796	5.2829	NA	1.86022	sorbic	PA01
64	7	20	NA	0.194396	0.0625734	0.194396	NA	54.0968	42.1477	5.75747	NA	2.72932	sorbic	PA01
65	6.5	0	NA	0.245736	0.036012	0.245736	NA	119.712	99.5234	6.90343	NA	2.1745	sorbic	PA01
66	6.5	5	NA	0.227009	0.0295785	0.227009	NA	53.8957	13.4676	5.7521	NA	1.90273	sorbic	PA01
67	6.5	10	NA	0.219087	0.035243	0.219087	NA	64.8991	29.7602	6.02013	NA	1.84222	sorbic	PA01
68	6.5	20	NA	0.20293	0.040632	0.20293	NA	32.1043	8.13521	5.0047	NA	1.94289	sorbic	PA01
69	6	0	NA	0.254734	0.0306576	0.254734	NA	55.1387	11.0156	5.78499	NA	1.56124	sorbic	PA01
70	6	5	NA	0.461055	0.583216	0.461055	NA	42.7576	37.6059	5.41811	NA	7.739	sorbic	PA01
71	6	10	NA	0.229977	0.0191234	0.229977	NA	23.6699	8.07509	4.56498	NA	3.30276	sorbic	PA01
72	6	20	NA	0.412487	0.391602	0.412487	NA	73.0543	83.5082	6.1909	NA	11.8894	sorbic	PA01
73	5.5	0	NA	0.361186	0.0479716	0.361186	NA	69.3425	16.0472	6.11567	NA	2.2734	sorbic	PA01
74	5.5	5	NA	0.245535	0.0762349	0.245535	NA	326.423	625.83	8.3506	NA	6.67064	sorbic	PA01
75	5.5	10	NA	22.8615	0	-22.8615	NA	0.905381	0	-0.143403	NA	11.6345	sorbic	PA01
76	5.5	20	NA	0.521086	0.479804	-0.521086	NA	0.50323	0.216409	-0.990709	NA	5.23107	sorbic	PA01
77	5	0	NA	0.260741	0.0131977	0.260741	NA	150.441	26.0935	7.23306	NA	2.20186	sorbic	PA01
78	5	5	NA	1.92384	2.37208	1.92384	NA	14.6869	19.4679	3.87646	NA	16.2602	sorbic	PA01
79	5	10	NA	7.24386	14.3967	-7.24386	NA	0.262291	0.376216	-1.93076	NA	5.6417	sorbic	PA01
80	5	20	NA	8.91229	13.7368	-8.91229	NA	0.545547	0.630647	-0.874225	NA	2.51159	sorbic	PA01
81	7	0	NA	0.226707	0.0301884	0.226707	NA	66.6784	33.7287	6.05915	NA	1.46607	citric	PA01
82	7	5	NA	0.308702	0.0420346	0.308702	NA	33.2603	6.7782	5.05573	NA	1.95627	citric	PA01
83	7	10	NA	0.377709	0.0345609	0.377709	NA	31.3673	4.7938	4.97119	NA	2.05727	citric	PA01
84	7	20	NA	0.358853	0.0355997	0.358853	NA	43.3644	17.8416	5.43844	NA	2.1208	citric	PA01
85	6.5	0	NA	0.232357	0.0514751	0.232357	NA	60.8591	45.4699	5.9274	NA	2.13608	citric	PA01
86	6.5	5	NA	0.300188	0.0293955	0.300188	NA	27.393	6.68072	4.77573	NA	2.03127	citric	PA01
87	6.5	10	NA	0.391667	0.0545287	0.391667	NA	30.3713	5.80702	4.92464	NA	2.37598	citric	PA01
88	6.5	20	NA	0.353564	0.0425798	0.353564	NA	64.2321	8.95223	6.00522	NA	2.0608	citric	PA01
89	6	0	NA	0.265732	0.048785	0.265732	NA	45.7177	10.3482	5.51468	NA	1.91713	citric	PA01
90	6	5	NA	0.350072	0.0268695	0.350072	NA	30.8383	5.52039	4.94665	NA	1.90911	citric	PA01
91	6	10	NA	0.412037	0.0489553	0.412037	NA	52.6099	8.24927	5.71726	NA	2.37479	citric	PA01
92	6	20	NA	0.312973	0.0503435	0.312973	NA	91.965	51.1477	6.52301	NA	2.8442	citric	PA01
93	5.5	0	NA	0.29309	0.0252025	0.29309	NA	49.9919	15.5858	5.64362	NA	1.93058	citric	PA01
94	5.5	5	NA	0.346381	0.0519265	0.346381	NA	85.8233	10.7084	6.4233	NA	2.0991	citric	PA01
95	5.5	10	NA	0.245439	0.0494302	0.245439	NA	570.05	846.785	9.15494	NA	15.5507	citric	PA01
96	5.5	20	NA	9.02549	11.515	9.02549	NA	1.91497	1.98429	0.937325	NA	3.84878	citric	PA01
97	5	0	NA	0.243897	0.0182072	0.243897	NA	153.003	48.2904	7.25741	NA	1.6331	citric	PA01
98	5	5	NA	6.30724	9.98039	6.30724	NA	1.21754	1.10032	0.283968	NA	0.659218	citric	PA01
99	5	10	NA	2.37221	6.89592	2.37221	NA	1.42436	0.619308	0.510317	NA	1.40644	citric	PA01
100	5	20	NA	4.2165	8.67523	4.2165	NA	1.19865	0.906373	0.261416	NA	0.771604	citric	PA01
101	7	0	NA	0.305063	0.0440228	0.305063	NA	50.6019	16.1503	5.66112	NA	1.82482	malic	PA01
102	7	5	NA	0.368728	0.0665611	0.368728	NA	28.0307	8.26426	4.80893	NA	2.0692	malic	PA01
103	7	10	NA	0.436696	0.129824	0.436696	NA	40.6577	9.03836	5.34546	NA	2.38423	malic	PA01
104	7	20	NA	0.488645	0.0609898	0.488645	NA	41.1102	13.3535	5.36142	NA	5.8918	malic	PA01
105	6.5	0	NA	0.296497	0.03283	0.296497	NA	71.9712	31.4612	6.16935	NA	1.709	malic	PA01
106	6.5	5	NA	0.367421	0.104616	0.367421	NA	41.9816	31.8282	5.39169	NA	3.75505	malic	PA01
107	6.5	10	NA	2.53247	7.25272	2.53247	NA	30.5393	19.2676	4.9326	NA	10.0989	malic	PA01
108	6.5	20	NA	2.71369	6.95565	2.71369	NA	40.3674	27.7248	5.33512	NA	11.0996	malic	PA01
109	6	0	NA	0.335144	0.0926701	0.335144	NA	44.6425	7.55569	5.48035	NA	2.27291	malic	PA01
110	6	5	NA	0.385148	0.0764717	0.385148	NA	30.7747	7.86934	4.94367	NA	1.97727	malic	PA01
111	6	10	NA	0.527207	0.119985	0.527207	NA	50.8822	16.6193	5.66909	NA	2.23154	malic	PA01
112	6	20	NA	0.528516	0.0745873	0.528516	NA	67.8751	18.5149	6.08481	NA	2.38851	malic	PA01
113	5.5	0	NA	0.306805	0.0464225	0.306805	NA	45.0488	11.456	5.49342	NA	2.1545	malic	PA01
114	5.5	5	NA	0.363425	0.0605069	0.363425	NA	34.0268	11.0723	5.0886	NA	1.64038	malic	PA01
115	5.5	10	NA	0.475225	0.0865973	0.475225	NA	53.2851	16.7243	5.73566	NA	2.07132	malic	PA01
116	5.5	20	NA	0.340816	0.161637	0.340816	NA	81.4842	47.408	6.34845	NA	6.66194	malic	PA01
117	5	0	NA	0.285049	0.0436753	0.285049	NA	138.127	53.1203	7.10985	NA	1.67178	malic	PA01
118	5	5	NA	3.74708	9.7887	3.74708	NA	74.4517	49.6609	6.21823	NA	20.0733	malic	PA01
119	5	10	NA	0.149021	0.297778	0.149021	NA	12.9208	23.6744	3.69162	NA	7.11092	malic	PA01
120	5	20	NA	5.87951	11.2822	5.87951	NA	17.3752	25.7093	4.11896	NA	15.2202	malic	PA01
121	7	0	NA	0.243804	0.0439533	0.243804	NA	47.5943	12.2489	5.57272	NA	1.68302	benzoic	PA01
122	7	5	NA	0.223581	0.0354795	0.223581	NA	37.3284	12.0622	5.2222	NA	1.76389	benzoic	PA01
123	7	10	NA	0.223916	0.0592606	0.223916	NA	48.6108	35.6178	5.6032	NA	2.36046	benzoic	PA01
124	7	20	NA	0.238339	0.0612862	0.238339	NA	28.7928	9.3799	4.84764	NA	2.03692	benzoic	PA01
125	6.5	0	NA	0.285974	0.0674794	0.285974	NA	51.8678	13.0546	5.69677	NA	2.42201	benzoic	PA01
126	6.5	5	NA	0.258601	0.0701745	0.258601	NA	36.8945	7.49683	5.20533	NA	2.31287	benzoic	PA01
127	6.5	10	NA	0.277673	0.15016	0.277673	NA	42.4428	36.1501	5.40745	NA	3.73079	benzoic	PA01
128	6.5	20	NA	0.252574	0.0972153	0.252574	NA	25.1908	5.75033	4.65482	NA	2.4472	benzoic	PA01
129	6	0	NA	0.308534	0.0663449	0.308534	NA	38.112	4.91311	5.25217	NA	2.72916	benzoic	PA01
130	6	5	NA	0.28463	0.0740618	0.28463	NA	30.9994	14.0693	4.95417	NA	2.81355	benzoic	PA01
131	6	10	NA	0.300904	0.113331	0.300904	NA	39.9397	24.2115	5.31975	NA	3.16861	benzoic	PA01
132	6	20	NA	0.280156	0.0751855	0.280156	NA	67.1753	128.021	6.06986	NA	4.64929	benzoic	PA01
133	5.5	0	NA	0.310476	0.0372863	0.310476	NA	32.5623	6.66026	5.02513	NA	2.47527	benzoic	PA01
134	5.5	5	NA	0.313197	0.0581152	0.313197	NA	28.5087	15.7719	4.83333	NA	2.37811	benzoic	PA01
135	5.5	10	NA	0.313736	0.0544818	0.313736	NA	46.2688	23.685	5.53197	NA	2.32051	benzoic	PA01
136	5.5	20	NA	0.254071	0.0687391	0.254071	NA	53.3718	36.1745	5.738	NA	3.31328	benzoic	PA01
137	5	0	NA	0.243711	0.034386	0.243711	NA	167.531	155.41	7.38829	NA	2.09179	benzoic	PA01
138	5	5	NA	0.238083	0.0598284	0.238083	NA	131.862	90.0076	7.04289	NA	3.56453	benzoic	PA01
139	5	10	NA	0.20269	0.0182069	0.20269	NA	174.661	99.0651	7.44842	NA	6.97269	benzoic	PA01
140	5	20	NA	2.65438	6.40809	-2.65438	NA	0.445712	0.50513	-1.16582	NA	8.91195	benzoic	PA01
141	7	0	NA	0.443537	0.0108138	0.443537	NA	98.0217	3.65817	6.61503	NA	3.12092	acetic	PA1054
142	7	5	NA	0.444218	0.027108	0.444218	NA	93.9297	3.35588	6.55351	NA	2.37162	acetic	PA1054
143	7	10	NA	0.493521	0.022887	0.493521	NA	118.562	2.20471	6.8895	NA	2.70898	acetic	PA1054
144	7	20	NA	0.422378	0.0259941	0.422378	NA	125.888	5.78147	6.97599	NA	2.40518	acetic	PA1054
145	6.5	0	NA	0.434249	0.00938494	0.434249	NA	87.0636	6.59684	6.444	NA	3.07889	acetic	PA1054
146	6.5	5	NA	0.444327	0.0203795	0.444327	NA	106.583	5.34845	6.73584	NA	2.46181	acetic	PA1054
147	6.5	10	NA	0.492947	0.00693104	0.492947	NA	150.12	2.23452	7.22998	NA	2.83248	acetic	PA1054
148	6.5	20	NA	0.360765	0.0155152	0.360765	NA	158.361	8.176	7.30707	NA	2.51016	acetic	PA1054
149	6	0	NA	0.403744	0.0119517	0.403744	NA	90.9007	2.40871	6.50622	NA	3.09684	acetic	PA1054
150	6	5	NA	0.433002	0.00922018	0.433002	NA	121.183	2.62041	6.92104	NA	2.92498	acetic	PA1054
151	6	10	NA	0.362636	0.00913349	0.362636	NA	188.061	7.58106	7.55506	NA	3.44558	acetic	PA1054
152	6	20	NA	0.23521	0.0206154	-0.23521	NA	0.807376	0.0838047	-0.308687	NA	8.88024	acetic	PA1054
153	5.5	0	NA	0.299611	0.0118896	0.299611	NA	63.8838	5.6875	5.99738	NA	2.61804	acetic	PA1054
154	5.5	5	NA	0.260409	0.00939699	0.260409	NA	225.72	52.1988	7.81839	NA	3.94082	acetic	PA1054
155	5.5	10	NA	7.34494	10.9152	-7.34494	NA	0.906737	0.745426	-0.141244	NA	2.15363	acetic	PA1054
156	5.5	20	NA	8.98169	12.1146	-8.98169	NA	0.887049	0.139933	-0.172915	NA	0.479774	acetic	PA1054
157	5	0	NA	0.233673	0.0125073	0.233673	NA	115.741	17.8834	6.85475	NA	2.05765	acetic	PA1054
158	5	5	NA	1.00609	0	-1.00609	NA	0.936873	0	-0.0940751	NA	6.16669	acetic	PA1054
159	5	10	NA	7.97161	11.9762	-7.97161	NA	0.829435	0.419796	-0.269799	NA	1.43021	acetic	PA1054
160	5	20	NA	10.7232	11.3477	10.7232	NA	1.07942	0.171151	0.11025	NA	0.335125	acetic	PA1054
161	7	0	NA	0.428879	0.0208932	0.428879	NA	94.5495	3.36773	6.563	NA	2.44195	butyric	PA1054
162	7	5	NA	0.379434	0.0176919	0.379434	NA	98.6035	4.34439	6.62357	NA	2.04254	butyric	PA1054
163	7	10	NA	0.36571	0.00809586	0.36571	NA	108.448	3.27414	6.76086	NA	2.01596	butyric	PA1054
164	7	20	NA	0.361764	0.050493	0.361764	NA	135.469	17.0839	7.08182	NA	1.75249	butyric	PA1054
165	6.5	0	NA	0.423072	0.016753	0.423072	NA	93.4967	2.41751	6.54684	NA	2.53198	butyric	PA1054
166	6.5	5	NA	0.398857	0.0127257	0.398857	NA	114.869	4.39638	6.84384	NA	1.7975	butyric	PA1054
167	6.5	10	NA	0.368152	0.0138736	0.368152	NA	155.555	9.17046	7.28128	NA	1.9494	butyric	PA1054
168	6.5	20	NA	0.243884	0.0114757	0.243884	NA	321.386	245.92	8.32816	NA	2.83259	butyric	PA1054
169	6	0	NA	0.412242	0.0246528	0.412242	NA	98.5883	4.10632	6.62334	NA	2.73872	butyric	PA1054
170	6	5	NA	0.335715	0.0249391	0.335715	NA	107.961	7.05557	6.75437	NA	2.58808	butyric	PA1054
171	6	10	NA	0.267213	0.0149341	0.267213	NA	226.407	78.4617	7.82277	NA	3.35013	butyric	PA1054
172	6	20	NA	5.98787	12.1594	-5.98787	NA	0.534776	0.514401	-0.902992	NA	4.25772	butyric	PA1054
173	5.5	0	NA	0.33463	0.0159322	0.33463	NA	92.8513	3.90065	6.53685	NA	2.32894	butyric	PA1054
174	5.5	5	NA	NA	NA	NA	NA	NA	NA	NA	NA	NA	butyric	PA1054
175	5.5	10	NA	8.69691	12.7104	-8.69691	NA	0.618067	0.491931	-0.694165	NA	2.88598	butyric	PA1054
176	5.5	20	NA	9.37887	14.2671	-9.37887	NA	0.740678	0.602681	-0.433081	NA	2.40071	butyric	PA1054
177	5	0	NA	0.246393	0.0171307	0.246393	NA	116.512	23.8725	6.86434	NA	1.8788	butyric	PA1054
178	5	5	NA	9.1826	13.0393	-9.1826	NA	0.626993	0.512665	-0.673478	NA	2.85609	butyric	PA1054
179	5	10	NA	9.68419	13.756	-9.68419	NA	0.818862	0.993711	-0.288307	NA	1.45319	butyric	PA1054
180	5	20	NA	5.04778	10.866	-5.04778	NA	0.827123	0.802303	-0.273827	NA	1.6928	butyric	PA1054
181	7	0	NA	0.46302	0.045938	0.46302	NA	88.9775	1.91487	6.47537	NA	2.80788	propionic	PA1054
182	7	5	NA	0.423068	0.0487182	0.423068	NA	105.661	3.27484	6.7233	NA	2.42344	propionic	PA1054
183	7	10	NA	0.365997	0.0322126	0.365997	NA	142.276	8.72622	7.15255	NA	2.12253	propionic	PA1054
184	7	20	NA	0.266287	0.0258005	0.266287	NA	254.122	98.9243	7.98938	NA	2.66249	propionic	PA1054
185	6.5	0	NA	0.434739	0.0432065	0.434739	NA	83.3388	2.09656	6.38092	NA	2.63816	propionic	PA1054
186	6.5	5	NA	0.375907	0.0260996	0.375907	NA	125.496	7.19097	6.97149	NA	2.77063	propionic	PA1054
187	6.5	10	NA	0.310699	0.0411936	0.310699	NA	243.756	99.3782	7.92929	NA	2.91642	propionic	PA1054
188	6.5	20	NA	NA	NA	NA	NA	NA	NA	NA	NA	NA	propionic	PA1054
189	6	0	NA	0.411588	0.0326063	0.411588	NA	83.8366	4.72629	6.38951	NA	2.62697	propionic	PA1054
190	6	5	NA	0.293681	0.0239231	0.293681	NA	163.78	31.6325	7.35561	NA	3.19355	propionic	PA1054
191	6	10	NA	NA	NA	NA	NA	NA	NA	NA	NA	NA	propionic	PA1054
192	6	20	NA	0.0024189	0.00590684	-0.0024189	NA	0.0198394	0.0484736	-5.65549	NA	4.62249	propionic	PA1054
193	5.5	0	NA	0.343989	0.0266758	0.343989	NA	85.9452	3.68056	6.42535	NA	2.54441	propionic	PA1054
194	5.5	5	NA	NA	NA	NA	NA	NA	NA	NA	NA	NA	propionic	PA1054
195	5.5	10	NA	1.13e-05	8.72e-06	-1.13e-05	NA	0.000200377	0.000309203	-12.285	NA	5.5336	propionic	PA1054
196	5.5	20	NA	2.94e-06	1.34e-06	-2.94e-06	NA	0.000110842	4.26e-05	-13.1392	NA	2.03917	propionic	PA1054
197	5	0	NA	0.26429	0.0171607	0.26429	NA	106.634	11.4109	6.73652	NA	1.92213	propionic	PA1054
198	5	5	NA	4.17e-06	4.23e-06	-4.17e-06	NA	6.73e-05	7.58e-05	-13.8586	NA	3.68862	propionic	PA1054
199	5	10	NA	4.65948	11.4133	-4.65948	NA	0.211461	0.51758	-2.24154	NA	10.7611	propionic	PA1054
200	5	20	NA	0.725303	0.868924	-0.725303	NA	0.892989	0.725594	-0.163285	NA	1.96122	propionic	PA1054
201	7	0	NA	0.411884	0.0318858	0.411884	NA	64.2615	2.89314	6.00588	NA	2.94381	sorbic	PA1054
202	7	5	NA	0.403038	0.0205289	0.403038	NA	86.6501	2.43894	6.43713	NA	2.2732	sorbic	PA1054
203	7	10	NA	0.408819	0.0180308	0.408819	NA	89.5539	4.23093	6.48468	NA	2.32439	sorbic	PA1054
204	7	20	NA	0.383477	0.0165207	0.383477	NA	81.3552	2.36095	6.34616	NA	2.3469	sorbic	PA1054
205	6.5	0	NA	0.415942	0.0253943	0.415942	NA	83.3218	1.40687	6.38062	NA	2.73107	sorbic	PA1054
206	6.5	5	NA	0.4034	0.0139552	0.4034	NA	83.7459	3.72106	6.38795	NA	2.36953	sorbic	PA1054
207	6.5	10	NA	0.400913	0.0164537	0.400913	NA	88.166	4.33575	6.46215	NA	2.31414	sorbic	PA1054
208	6.5	20	NA	0.359059	0.0136886	0.359059	NA	77.3838	4.48006	6.27396	NA	2.30316	sorbic	PA1054
209	6	0	NA	0.406496	0.0181373	0.406496	NA	83.4791	2.48257	6.38334	NA	2.76066	sorbic	PA1054
210	6	5	NA	0.37054	0.0159424	0.37054	NA	84.5318	3.18999	6.40142	NA	2.27698	sorbic	PA1054
211	6	10	NA	0.355821	0.0315562	0.355821	NA	76.4252	3.4788	6.25598	NA	2.39206	sorbic	PA1054
212	6	20	NA	0.269361	0.0221934	0.269361	NA	66.7593	6.96894	6.0609	NA	2.28317	sorbic	PA1054
213	5.5	0	NA	0.364639	0.0193958	0.364639	NA	68.2789	1.94557	6.09337	NA	2.5989	sorbic	PA1054
214	5.5	5	NA	0.300935	0.0203361	0.300935	NA	56.1194	2.53726	5.81043	NA	2.23224	sorbic	PA1054
215	5.5	10	NA	0.276104	0.0136934	0.276104	NA	65.858	3.70382	6.04129	NA	2.47304	sorbic	PA1054
216	5.5	20	NA	NA	NA	NA	NA	NA	NA	NA	NA	NA	sorbic	PA1054
217	5	0	NA	0.237767	0.0140161	0.237767	NA	129.652	13.3801	7.0185	NA	2.25528	sorbic	PA1054
218	5	5	NA	0.592129	0.542762	0.592129	NA	1.29259	0.271751	0.370261	NA	1.30019	sorbic	PA1054
219	5	10	NA	4.13764	9.22633	-4.13764	NA	0.989199	0.534732	-0.0156667	NA	1.20272	sorbic	PA1054
220	5	20	NA	0.300343	0.220603	0.300343	NA	1.13161	0.605274	0.178373	NA	0.949862	sorbic	PA1054
221	7	0	NA	0.417395	0.00401001	0.417395	NA	81.1666	3.59099	6.34281	NA	2.55265	citric	PA1054
222	7	5	NA	0.448743	0.0504536	0.448743	NA	83.5429	4.15669	6.38444	NA	2.18341	citric	PA1054
223	7	10	NA	0.418921	0.0236486	0.418921	NA	89.9798	2.66515	6.49153	NA	2.58456	citric	PA1054
224	7	20	NA	0.367823	0.0401445	0.367823	NA	67.7025	4.58174	6.08114	NA	2.45319	citric	PA1054
225	6.5	0	NA	0.445013	0.0327373	0.445013	NA	88.8597	2.05444	6.47346	NA	2.56268	citric	PA1054
226	6.5	5	NA	0.482292	0.0499111	0.482292	NA	94.5925	2.88813	6.56365	NA	2.53685	citric	PA1054
227	6.5	10	NA	0.437116	0.0513012	0.437116	NA	94.5661	6.7341	6.56325	NA	2.54606	citric	PA1054
228	6.5	20	NA	0.435018	0.0323043	0.435018	NA	90.4259	4.75374	6.49866	NA	2.62167	citric	PA1054
229	6	0	NA	0.417617	0.00692899	0.417617	NA	96.4933	3.03937	6.59236	NA	2.73606	citric	PA1054
230	6	5	NA	0.468865	0.0781565	0.468865	NA	70.7821	3.19629	6.14531	NA	2.36478	citric	PA1054
231	6	10	NA	0.479631	0.0148735	0.479631	NA	111.23	4.55271	6.7974	NA	2.60092	citric	PA1054
232	6	20	NA	0.325067	0.0443682	0.325067	NA	91.0956	7.9144	6.50931	NA	2.75279	citric	PA1054
233	5.5	0	NA	0.337553	0.00756447	0.337553	NA	99.5346	1.68191	6.63713	NA	2.22151	citric	PA1054
234	5.5	5	NA	0.384656	0.0556523	0.384656	NA	74.1579	3.00343	6.21253	NA	2.46393	citric	PA1054
235	5.5	10	NA	0.225611	0	0.225611	NA	226.598	0	7.82399	NA	6.06941	citric	PA1054
236	5.5	20	NA	0.537664	0.987248	-0.537664	NA	0.952405	1.13568	-0.0703525	NA	1.52404	citric	PA1054
237	5	0	NA	0.223988	0.0136365	0.223988	NA	160.375	41.7553	7.32531	NA	1.88625	citric	PA1054
238	5	5	NA	0.460372	0.670348	0.460372	NA	3.0035	2.44303	1.58665	NA	5.51487	citric	PA1054
239	5	10	NA	19.6406	14.2212	19.6406	NA	1.06906	0.487134	0.0963399	NA	0.923574	citric	PA1054
240	5	20	NA	22.4345	12.5299	22.4345	NA	1.28023	1.11156	0.356403	NA	1.19687	citric	PA1054
241	7	0	NA	0.397197	0.016875	0.397197	NA	72.1927	2.89951	6.17378	NA	2.63269	malic	PA1054
242	7	5	NA	0.417938	0.0224373	0.417938	NA	60.7368	2.85035	5.9245	NA	1.8199	malic	PA1054
243	7	10	NA	0.472703	0.0285964	0.472703	NA	62.9316	1.93346	5.97571	NA	2.14521	malic	PA1054
244	7	20	NA	0.491721	0.0429864	0.491721	NA	72.0103	2.1755	6.17013	NA	2.29136	malic	PA1054
245	6.5	0	NA	0.39304	0.00692924	0.39304	NA	70.036	1.15432	6.13002	NA	2.55257	malic	PA1054
246	6.5	5	NA	0.416243	0.0184299	0.416243	NA	58.4966	4.858	5.87028	NA	1.92502	malic	PA1054
247	6.5	10	NA	0.473317	0.018617	0.473317	NA	62.3167	2.20165	5.96155	NA	2.22343	malic	PA1054
248	6.5	20	NA	0.499596	0.0153567	0.499596	NA	76.2789	2.83713	6.25321	NA	2.44501	malic	PA1054
249	6	0	NA	0.384645	0.010905	0.384645	NA	74.0078	1.6103	6.20961	NA	2.5471	malic	PA1054
250	6	5	NA	0.38327	0.0094711	0.38327	NA	55.2305	1.91209	5.78739	NA	1.82064	malic	PA1054
251	6	10	NA	0.461372	0.0318949	0.461372	NA	65.3552	3.62423	6.03023	NA	2.24264	malic	PA1054
252	6	20	NA	0.435843	0.00988342	0.435843	NA	72.1446	1.68579	6.17282	NA	2.54801	malic	PA1054
253	5.5	0	NA	0.324108	0.0043926	0.324108	NA	71.4005	4.35706	6.15786	NA	2.42067	malic	PA1054
254	5.5	5	NA	0.321646	0.0101412	0.321646	NA	61.9181	2.13624	5.95229	NA	1.76692	malic	PA1054
255	5.5	10	NA	0.28309	0.0216655	0.28309	NA	82.179	6.02448	6.3607	NA	2.11237	malic	PA1054
256	5.5	20	NA	0.862909	1.52919	0.862909	NA	20.6183	37.8035	4.36585	NA	17.6078	malic	PA1054
257	5	0	NA	0.232794	0.0075147	0.232794	NA	113.685	13.3706	6.8289	NA	2.06632	malic	PA1054
258	5	5	NA	NA	NA	NA	NA	NA	NA	NA	NA	NA	malic	PA1054
259	5	10	NA	0.718276	0.773574	0.718276	NA	2.54127	2.06722	1.34555	NA	5.16522	malic	PA1054
260	5	20	NA	5.08775	10.8171	5.08775	NA	2.37342	1.4318	1.24697	NA	3.67543	malic	PA1054
261	7	0	NA	0.457768	0.0187048	0.457768	NA	101.344	9.15065	6.66312	NA	2.39176	benzoic	PA1054
262	7	5	NA	0.468713	0.0226214	0.468713	NA	89.568	4.84988	6.48491	NA	2.40305	benzoic	PA1054
263	7	10	NA	0.473403	0.0257239	0.473403	NA	101.246	3.981	6.66172	NA	2.54635	benzoic	PA1054
264	7	20	NA	0.448237	0.0353435	0.448237	NA	100.437	6.29681	6.65014	NA	1.99806	benzoic	PA1054
265	6.5	0	NA	0.468476	0.0280042	0.468476	NA	97.6768	1.39794	6.60994	NA	2.56964	benzoic	PA1054
266	6.5	5	NA	0.461681	0.0217668	0.461681	NA	76.7924	4.05117	6.26289	NA	2.93694	benzoic	PA1054
267	6.5	10	NA	0.50729	0.0304848	0.50729	NA	121.931	4.19208	6.92992	NA	2.24494	benzoic	PA1054
268	6.5	20	NA	0.463346	0.0278505	0.463346	NA	102.506	6.3587	6.67957	NA	2.07968	benzoic	PA1054
269	6	0	NA	0.413993	0.0451258	0.413993	NA	78.9231	5.12459	6.30238	NA	2.34992	benzoic	PA1054
270	6	5	NA	0.47082	0.0346015	0.47082	NA	85.8545	4.82515	6.42382	NA	2.401	benzoic	PA1054
271	6	10	NA	0.456813	0.0462683	0.456813	NA	89.137	6.37985	6.47795	NA	2.40857	benzoic	PA1054
272	6	20	NA	0.410333	0.0514903	0.410333	NA	77.7238	12.1404	6.28028	NA	1.85839	benzoic	PA1054
273	5.5	0	NA	0.363094	0.0213044	0.363094	NA	80.4911	6.44675	6.33076	NA	2.41209	benzoic	PA1054
274	5.5	5	NA	0.402969	0.0161676	0.402969	NA	64.0193	2.39165	6.00044	NA	2.45616	benzoic	PA1054
275	5.5	10	NA	0.398043	0.0209664	0.398043	NA	73.1425	6.8802	6.19264	NA	2.14314	benzoic	PA1054
276	5.5	20	NA	0.305476	0.0320393	0.305476	NA	53.9224	4.3611	5.75281	NA	2.1271	benzoic	PA1054
277	5	0	NA	0.242127	0.0159736	0.242127	NA	111.374	26.0257	6.79927	NA	1.57844	benzoic	PA1054
278	5	5	NA	0.204252	0.0112167	0.204252	NA	142.854	34.6561	7.1584	NA	2.55475	benzoic	PA1054
279	5	10	NA	NA	NA	NA	NA	NA	NA	NA	NA	NA	benzoic	PA1054
280	5	20	NA	6.97084	13.4317	6.97084	NA	1.33193	0.401426	0.413516	NA	1.2289	benzoic	PA1054
